# Supplementary material for: Evaluation of the Correlation Between Depression and Physical Activity Among Elderly Patients with Osteoporosis: A Cross-Sectional Study
Source: Research Square preprint supplement (doi:10.21203/rs.3.rs-687721/v1), 2021-07-26
Supplement: Supplementary file 1 [file edb90f3fe192a3b7c29d34e8.xls]

## Sheet: Sheet1
Table 1. Demographic characteristics of the participants and anxiety and depression
Variables	Anxiety						Depression
	None	Mild	Moderate n(%)	Severe	X2	P	None	Mild	Moderate n(%)	Severe	X2	P
	n(%)	n(%)		n(%)			n(%)	n(%)		n(%)
Age, y					6.101	0.107					6.381	0.094
60-74	31(73.8)	48(70.6)	14(48.3)	21(61.8)			40(78.4)	19(61.3)	31(66.0)	24(54.5)
≥75	11(26.2)	20(29.4)	15(51.7)	13(38.2)			11(21.6)	12(38.7)	16(34.0)	20(45.5)
Sex					3.001	0.391					1.006	0.8
Male	9(21.4)	9(13.2)	7(24.1)	4(11.8)			10(19.6)	6(19.4)	6(12.8)	7(15.9)
Female	33(78.6)	59(86.8)	22(75.9)	30(88.2)			41(80.4)	25(80.6)	41(87.2)	37(84.1)
Marital status					6.883	0.076					3.709	0.295
Married	34(81.0)	59(86.8)	23(79.3)	22(64.7)			41(80.4)	27(87.1)	39(83)	31(70.5)
Divorced/Widowed	8(19.0)	9(13.2)	6(20.7)	12(35.3)			10(19.6)	4(12.9)	8(17)	13(29.5)
Education					9.618	0.382					14.631	0.102
＜Primary school and below	15(35.7)	25(36.8)	11(37.9)	10(29.4)			14(27.5)	13(41.9)	16(34)	18(40.9)
Junior high school	13(31)	16(23.5)	6(20.7)	13(38.2)			16(31.4)	6(19.4)	10(21.3)	16(36.4)
High school	6(14.3)	17(25)	6(20.7)	10(29.4)			9(17.6)	9(29.0)	12(25.5)	9(20.5)
College and above	8(19)	10(14.7)	6(20.7)	1(2.9)			12(23.5)	3(9.7)	9(19.1)	1(2.3)
Occupation					33.902	0.004					42.174	0
None	8(19)	14(20.6)	8(27.6)	10(29.4)			7(13.7)	5(16.1)	11(23.4)	17(38.6)
Professionals	7(16.7)	22(32.4)	12(41.4)	10(29.4)			11(21.6)	9(29.0)	21(44.7)	10(22.7)
Manual workers	10(23.8)	12(17.6)	3(10.3)	0(0.0)			11(21.6)	8(25.8)	5(10.6)	1(2.3)
Businessman	3(7.1)	8(11.8)	2(6.9)	11(32.4)			5(9.8)	6(19.4)	2(4.3)	11(25.0)
Public officer	4(9.5)	4(5.9)	3(10.3)	1(2.9)			4(7.8)	2(6.5)	4(8.5)	2(4.5)
Others	10(23.8)	8(11.8)	1(3.4)	2(5.9)			13(25.5)	1(3.2)	4(8.5)	3(6.8)
Residence					25.26	0					34.393	0
Alone/Nursing Home	5(11.9)	3(4.4)	5(17.2)	0			6(11.8)	0(0.0)	7(14.9)	0
Living with spouse	16(38.1)	33(48.5)	12(41.4)	4(11.8)			24(47.1)	17(54.8)	19(40.4)	5(11.4)
Living with child	21(50.0)	32(47.1)	12(41.4)	30(88.2)			21(41.2)	14(45.2)	21(44.7)	39(88.6)
Income					10.481	0.106					16.959	0.009
Pension/Social Security	27(64.3)	42(61.8)	18(62.1)	19(55.9)			36(70.6)	16(51.6)	32(68.1)	22(50.0)
Child support	9(21.4)	23(33.8)	11(37.9)	14(41.2)			9(17.6)	12(38.7)	15(31.9)	21(47.7)
Others	6(14.3)	3(4.4)	0	1(2.9)			6(11.8)	3(9.7)	0	1(2.3)
BMI (kg/m2 )					9.003	0.437					6.289	0.711
＜18.5	7(16.7)	9(13.2)	1(3.4)	1(2.9)			7(13.7)	4(12.9)	4(8.5)	3(6.8)
18.5-23.9	25(59.5)	34(50.0)	16(55.2)	20(58.8)			29(56.9)	14(45.2)	29(61.7)	23(52.3)
24-27.9	9(21.4)	20(29.4)	11(37.9)	11(32.4)			14(25.5)	10(32.3)	11(23.4)	16(36.4)
＞28	1(2.4)	5(7.4)	1(3.4)	2(5.9)			1(2.0)	3(9.7)	3(6.4)	2(4.5)
Smoking					1.016	0.797					1.989	0.575
No	38(90.5)	63(92.6)	25(86.2)	31(91.2)			45(88.2)	30(96.8)	43(91.5)	39(88.6)
Yes	4(9.5)	5(7.4)	4(13.8)	3(8.8)			6(11.8)	1(3.2)	4(8.5)	5(11.4)
Drinking					3.937	0.268					4.487	0.213
No	37(88.1)	64(94.1)	24(82.8)	32(94.1)			44(86.3)	31(100.0)	42(89.4)	40(90.9)
Yes	5(11.9)	4(5.9)	5(17.2)	2(5.9)			7(13.7)	0	5(10.6)	4(9.1)
Pain					28.544	0					20.714	0
No	12(28.6)	3(4.4)	0	0			12(23.5)	1(3.2)	2(4.3)	0
Yes	30(71.4)	65(95.6)	29(100.0)	34(100.0)			39(76.5)	30(96.8)	45(95.7)	44(100.0)
Fracture					8.715	0.033					0.851	0.837
No	27(64.3)	52(76.5)	14(48.3)	19(55.9)			34(66.7)	21(67.7)	31(66.0)	26(59.1)
Yes	15(35.7)	16(23.5)	15(51.7)	15(44.1)			17(33.3)	10(32.3)	16(34.0)	18(40.9)
Number of nonOP chronic conditions					41.662	0					18.59	0.029
No	15(35.7)	30(44.1)	6(20.7)	0			17(33.3)	13(41.9)	14(29.8)	7(15.9)
1	23(54.8)	27(39.7)	13(44.8)	14(41.2)			27(52.9)	14(45.2)	19(40.4)	17(38.6)
2	3(7.1)	9(13.2)	8(27.6)	13(38.2)			5(9.8)	4(12.9)	10(21.3)	14(31.8)
≥3	1(2.4)	2(2.9)	2(6.9)	7(20.6)			2(3.9)	0	4(8.5)	6(13.6)
Type of drug					82.717	0					45.816	0
No	9(21.4)	1(1.5)	3(10.3)	1(2.9)			7(13.7)	3(9.7)	1(2.1)	3(6.8)
＜5	31(73.8)	65(95.6)	19(65.5)	10(29.4)			42(82.4)	26(83.9)	39(83.0)	18(40.9)
≥5	2(4.8)	2(2.9)	7(24.1)	23(67.6)			2(3.9)	2(6.5)	7(14.9)	23(52.3)
Participation in social activity					45.523	0					28.801	0.001
No	20(47.6)	14(20.6)	15(51.7)	29(85.3)			20(39.2)	8(25.8)	17(36.2)	33(75.0)
1-2 times/year	16(38.1)	42(61.8)	14(48.3)	4(11.8)			23(45.1)	17(54.8)	26(55.3)	10(22.7)
1-2 times/month	3(7.1)	9(13.2)	0	0			4(7.8)	5(16.1)	3(6.4)	0
1-2 times/week	3(7.1)	3(4.4)	0	1(2.9)			4(7.8)	1(3.2)	1(2.1)	1(2.3)
ADL					19.388	0.022					33.568	0
Heavy	1(2.4)	3(4.4)	1(3.4)	4(11.8)			0	1(3.2)	2(4.3)	6(13.6)
Moderate	2(4.8)	7(10.3)	5(17.2)	4(11.8)			1(2.0)	2(6.5)	6(12.8)	9(20.5)
Mild	15(35.7)	40(58.8)	15(51.7)	19(55.9)			21(41.2)	18(58.1)	29(61.7)	21(47.7)
No	24(57.1)	18(26.5)	8(27.6)	7(20.6)			29(56.9)	10(32.3)	10(21.3)	8(18.2)
Frailty phenotype					39.934	0					44.203	0
Nonfrail	12(28.6)	1(1.5)	0	0			13(25.5)	0	0	0
Prefrail	11(26.2)	15(22.1)	5(17.2)	5(14.7)			16(31.4)	7(22.6)	7(14.9)	6(13.6)
Frail	19(45.2)	52(76.5)	24(82.8)	29(85.3)			22(43.1)	24(77.4)	40(85.1)	38(86.4)
